# Supplementary material for: The Effect of Abemaciclib Plus Fulvestrant on Overall Survival in Hormone Receptor–Positive, ERBB2-Negative Breast Cancer That Progressed on Endocrine Therapy—MONARCH 2: A Randomized Clinical Trial
Source: PubMed Central journal article supplement — JAMA Oncol. 2019 Sep 29;6(1):116–24. doi: 10.1001/jamaoncol.2019.4782 (PMC6777264; doi:10.1001/jamaoncol.2019.4782), 2019-09-29
Supplement: jamaoncol-6-116-s002.pdf [file jamaoncol-6-116-s002.pdf]

## Supplementary Online Content

Sledge GW Jr, Toi M, Neven P, et al. The effect of abemaciclib plus fulvestrant on overall survival in hormone receptor–positive, ERBB2-negative breast cancer that progressed on endocrine therapy—MONARCH 2: a randomized clinical trial. Published online September 29, 2019. *JAMA Oncol*. doi:10.1001/jamaoncol.2019.4782

**eTable 1.** Patient and Disease Baseline Characteristics

**eTable 2.** Treatment-emergent Adverse Events

**eFigure 1.** Post Discontinuation Therapy

**eFigure 2.** Kaplan-Meier Plots of Updated Progression-free Survival

**eFigure 3.** Kaplan-Meier Plot of Time to Second Disease Progression (PFS2)

**eFigure 4.** Kaplan-Meier Plots of Time to Chemotherapy (TTC) and Chemotherapy-free Survival (CFS)

This supplementary material has been provided by the authors to give readers additional information about their work.

**eTable 1. Patient and Disease Baseline Characteristics**

| Characteristic                                                    | Abemaciclib + Fulvestrant<br>N=446 | Placebo + Fulvestrant<br>N=223 |
|-------------------------------------------------------------------|------------------------------------|--------------------------------|
| Median age, years (range)                                         | 59 (32-91)                         | 62 (32-87)                     |
| ET resistance <sup>a</sup> , No. (%)                              |                                    |                                |
| Primary                                                           | 111 (24.9)                         | 58 (26.0)                      |
| Secondary                                                         | 326 (73.1)                         | 163 (73.1)                     |
| Most recent ET <sup>b</sup> , No. (%)                             |                                    |                                |
| (Neo)adjuvant                                                     | 263 (59.0)                         | 133 (59.6)                     |
| Metastatic                                                        | 171 (38.3)                         | 85 (38.1)                      |
| Prior AI, No. (%)                                                 |                                    |                                |
| Yes                                                               | 316 (70.9)                         | 149 (66.8)                     |
| No                                                                | 130 (29.1)                         | 74 (33.2)                      |
| PgR status <sup>c</sup> , No. (%)                                 |                                    |                                |
| Positive                                                          | 339 (76.0)                         | 171 (76.7)                     |
| Negative                                                          | 96 (21.5)                          | 44 (19.7)                      |
| Metastatic site, No. (%)                                          |                                    |                                |
| Visceral                                                          | 245 (54.9)                         | 128 (57.4)                     |
| Bone only                                                         | 123 (27.6)                         | 57 (25.6)                      |
| Other                                                             | 75 (16.8)                          | 38 (17.0)                      |
| Measurable disease, No. (%)                                       |                                    |                                |
| Yes                                                               | 318 (71.3)                         | 164 (73.5)                     |
| No                                                                | 128 (28.7)                         | 59 (26.5)                      |
| Race <sup>d</sup> , No. (%)                                       |                                    |                                |
| Asian                                                             | 149 (33.4)                         | 65 (29.1)                      |
| Caucasian                                                         | 237 (53.1)                         | 136 (61.0)                     |
| Other                                                             | 29 (6.5)                           | 13 (5.8)                       |
| ECOG performance status <sup>e</sup> , No. (%)                    |                                    |                                |
| 0                                                                 | 264 (59.2)                         | 136 (61.0)                     |
| 1                                                                 | 176 (39.5)                         | 87 (39.0)                      |
| Prior chemotherapy for neoadjuvant or adjuvant treatment, No. (%) |                                    |                                |
| Yes                                                               | 267 (59.9)                         | 134 (60.1)                     |
| No                                                                | 179 (40.1)                         | 89 (39.9)                      |
| Menopausal status, No. (%)                                        |                                    |                                |
| Pre- or perimenopausal                                            | 72 (16.1)                          | 42 (18.8)                      |
| Postmenopausal                                                    | 371 (83.2)                         | 180 (80.7)                     |

<sup>a</sup>Percentages do not add up to 100% due to missing values

<sup>b</sup>8 patients (6 abemaciclib arm; 2 placebo) had no prior endocrine therapies.

<sup>c</sup>8 patients in each arm had unknown PgR status.

<sup>d</sup>31 patients in the abemaciclib arm and 9 in the placebo arm had missing race information

<sup>e</sup>One patient (abemaciclib arm) had ECOG performance status of 2.

Abbreviations: AI, aromatase inhibitor; ECOG, Eastern Cooperative Oncology Group; ET, endocrine therapy; N, number of patients in population; No., number of patients; PgR, progesterone receptor

**eTable 2. Treatment-emergent Adverse Events**

| TEAE ≥10%<br>in either arm | Abemaciclib + Fulvestrant<br>N=441 |                    |                    | Placebo + Fulvestrant<br>N=223 |                    |                    |
|----------------------------|------------------------------------|--------------------|--------------------|--------------------------------|--------------------|--------------------|
|                            | CTCAE Grade                        |                    |                    |                                |                    |                    |
|                            | All<br>No. (%)                     | Grade 3<br>No. (%) | Grade 4<br>No. (%) | All<br>No. (%)                 | Grade 3<br>No. (%) | Grade 4<br>No. (%) |
| Any                        | 435 (98.6)                         | 259 (58.7)         | 32 (7.3)           | 203 (91.0)                     | 51 (22.9)          | 9 (4.0)            |
| Diarrhea                   | 384 (87.1)                         | 64 (14.5)          | 0                  | 62 (27.8)                      | 1 (0.4)            | 0                  |
| Neutropenia                | 219 (49.7)                         | 118 (26.8)         | 13 (2.9)           | 9 (4.0)                        | 3 (1.3)            | 1 (0.4)            |
| Nausea                     | 217 (49.2)                         | 12 (2.7)           | -                  | 56 (25.1)                      | 5 (2.2)            | -                  |
| Fatigue                    | 189 (42.9)                         | 18 (4.1)           | -                  | 64 (28.7)                      | 2 (0.9)            | -                  |
| Abdominal pain             | 164 (37.2)                         | 14 (3.2)           | -                  | 37 (16.6)                      | 2 (0.9)            | -                  |
| Anemia                     | 153 (34.7)                         | 39 (8.8)           | 1 (0.2)            | 10 (4.5)                       | 3 (1.3)            | 0                  |
| Leukopenia                 | 146 (33.1)                         | 48 (10.9)          | 1 (0.2)            | 4 (1.8)                        | 0                  | 0                  |
| Decreased appetite         | 127 (28.8)                         | 5 (1.1)            | 0                  | 30 (13.5)                      | 1 (0.4)            | 0                  |
| Vomiting                   | 127 (28.8)                         | 4 (0.9)            | 0                  | 26 (11.7)                      | 5 (2.2)            | 0                  |
| Headache                   | 106 (24.0)                         | 3 (0.7)            | -                  | 36 (16.1)                      | 1 (0.4)            | -                  |
| Dysgeusia                  | 82 (18.6)                          | -                  | -                  | 6 (2.7)                        | -                  | -                  |
| URTI                       | 82 (18.6)                          | 0                  | 0                  | 17 (7.6)                       | 2 (0.9)            | 0                  |
| Stomatitis                 | 77 (17.5)                          | 1 (0.2)            | 1 (0.2)            | 24 (10.8)                      | 0                  | 0                  |
| Thrombocytopenia           | 77 (17.5)                          | 9 (2.0)            | 6 (1.4)            | 6 (2.7)                        | 0                  | 1 (0.4)            |
| Alopecia                   | 76 (17.2)                          | -                  | -                  | 4 (1.8)                        | -                  | -                  |
| Cough                      | 73 (16.6)                          | 1 (0.2)            | 1 (0.2)            | 29 (13.0)                      | 0                  | -                  |
| ALT increased              | 70 (15.9)                          | 19 (4.3)           | 1 (0.2)            | 12 (5.4)                       | 4 (1.8)            | 0                  |
| Constipation               | 70 (15.9)                          | 3 (0.7)            | 0                  | 36 (16.1)                      | 1 (0.4)            | 0                  |
| Arthralgia                 | 69 (15.6)                          | 2 (0.5)            | 1 (0.2)            | 33 (14.8)                      | 1(0.4)             | -                  |
| AST increased              | 69 (15.6)                          | 12 (2.7)           | 0                  | 16 (7.2)                       | 7 (3.1)            | 0                  |
| Dizziness                  | 66 (15.0)                          | 3 (0.7)            | -                  | 16 (7.2)                       | 0                  | -                  |
| Blood creatinine increased | 64 (14.5)                          | 4 (0.9)            | 0                  | 1 (0.4)                        | 0                  | 0                  |
| Pruritus                   | 64 (14.5)                          | 0                  | -                  | 15 (6.7)                       | 0                  | -                  |
| Oedema peripheral          | 62 (14.1)                          | 0                  | -                  | 16 (7.2)                       | 0                  | -                  |
| Pyrexia                    | 59 (13.4)                          | 3 (0.7)            | 2 (0.5)            | 16 (7.2)                       | 1 (0.4)            | 0                  |
| Back pain                  | 57 (12.9)                          | 3 (0.7)            | -                  | 32 (14.3)                      | 3 (1.3)            | -                  |
| Dyspnoea                   | 53 (12.0)                          | 11 (2.5)           | 1 (0.2)            | 26 (11.7)                      | 3 (1.3)            | 0                  |
| Weight decreased           | 53 (12.0)                          | 1 (0.2)            | -                  | 7 (3.1)                        | 2 (0.9)            | -                  |
| Muscular weakness          | 52 (11.8)                          | 6 (1.4)            | -                  | 13 (5.8)                       | 0                  | -                  |
| Pain in extremity          | 52 (11.8)                          | 2 (0.5)            | -                  | 9 (4.0)                        | 1 (0.4)            | -                  |
| Rash                       | 52 (11.8)                          | 5 (1.1)            | 0                  | 11 (4.9)                       | 0                  | 0                  |
| Hot flush                  | 51 (11.6)                          | 0                  | -                  | 24 (10.8)                      | 0                  | -                  |
| Dry skin                   | 45 (10.2)                          | 0                  | -                  | 4 (1.8)                        | 0                  | -                  |
| Lymphopenia                | 45 (10.2)                          | 17 (3.9)           | 1 (0.2)            | 2 (0.9)                        | 0                  | 1 (0.4)            |
| UTI                        | 44 (10.0)                          | 4 (0.9)            | 0                  | 10 (4.5)                       | 1 (0.4)            | 0                  |

Abbreviations: ALT, alanine aminotransferase; AST, aspartate aminotransferase; CTCAE, Common Terminology Criteria for Adverse Events; N, number of patients in population; No., number of patients; TEAE, treatment-emergent adverse event; URTI, upper respiratory tract infection; UTI, urinary tract infection

A

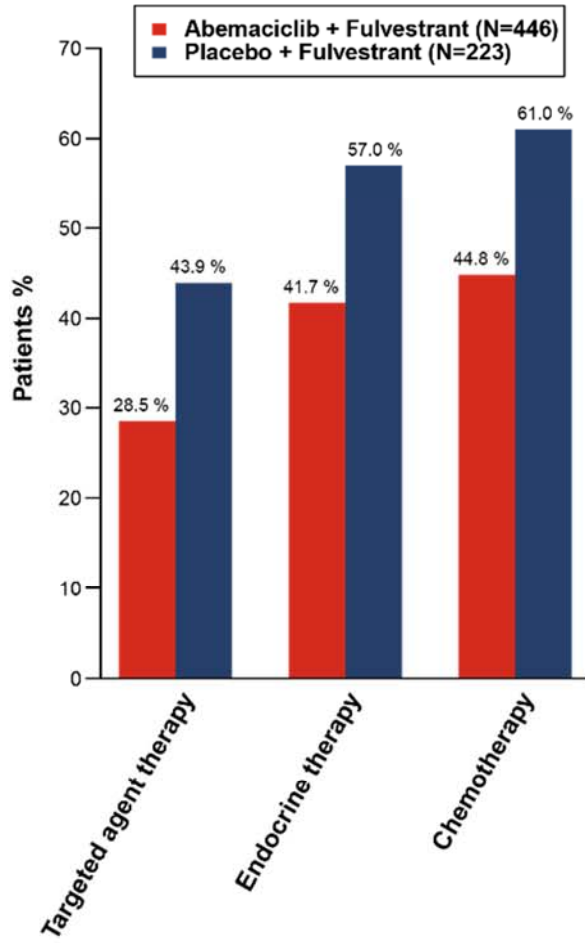

B

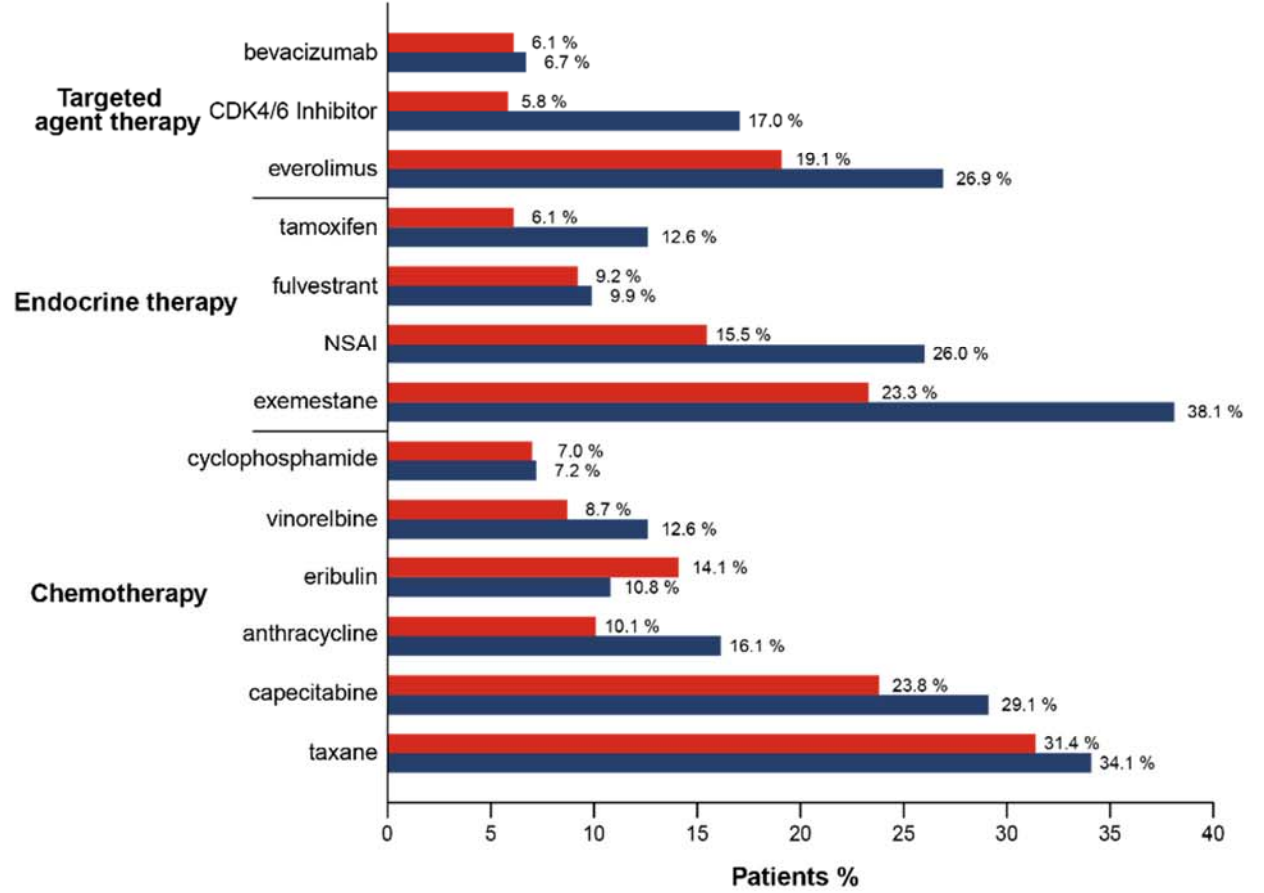

**eFigure 1: Post Discontinuation Therapy**

Panel A reports selected subsequent systemic therapies. Panel B indicates selected subsequent regimens. Subsequent systemic therapies were received by 281 (63.0%) patients in abemaciclib arm and 180 (80.7%) in the placebo arm; percentages were calculated using number patients receiving each therapy out of the number of randomized patients in each treatment arm.

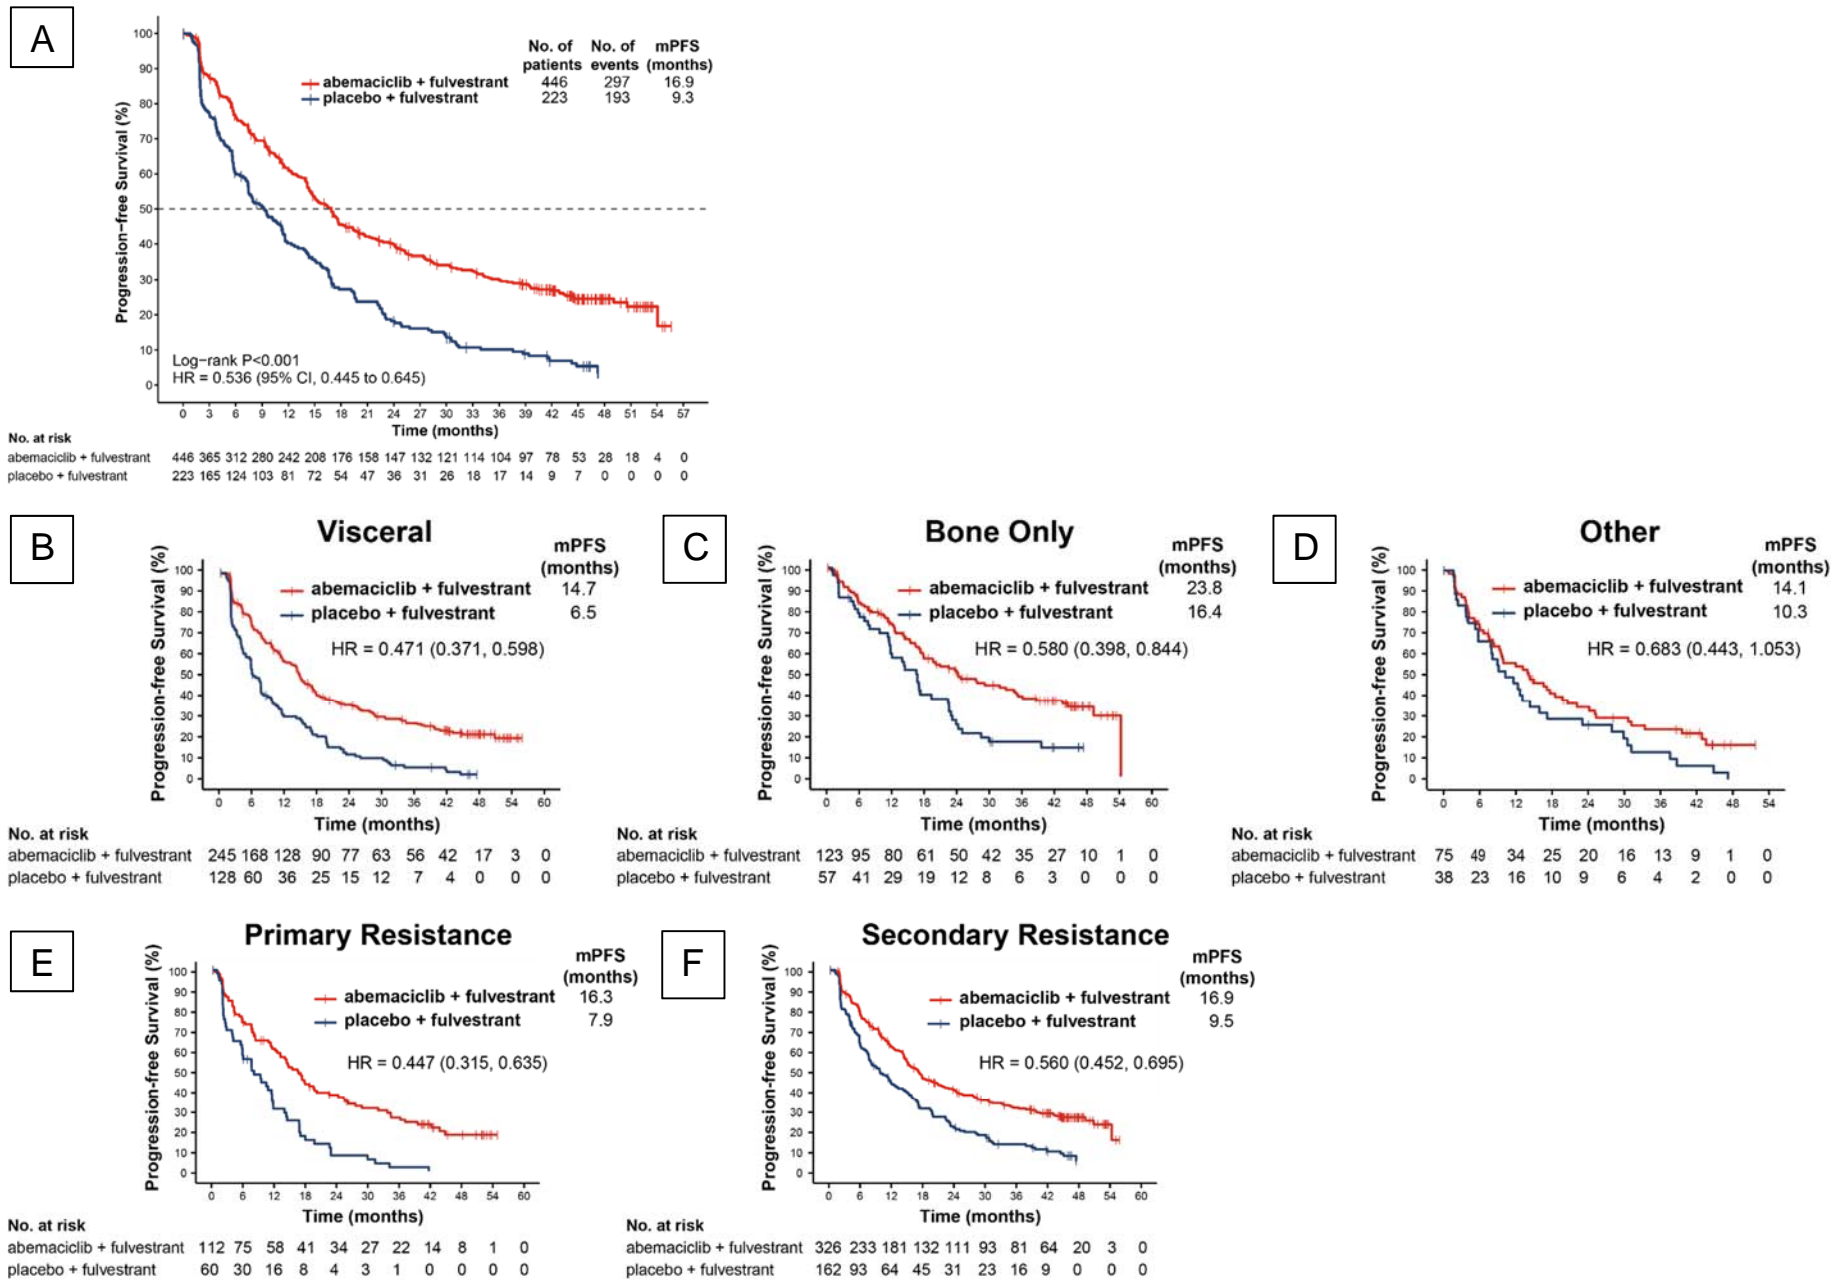

**eFigure 2: Kaplan-Meier Plots of Updated Progression-free Survival**

Panel A, updated PFS in the ITT population. Panel B-D, updated PFS by metastatic site. Panel E-F, updated PFS by resistance to endocrine therapy. HR, hazard ratio; ITT, intent-to-treat; mPFS, median PFS; No, number; P, p-value; PFS, progression-free survival

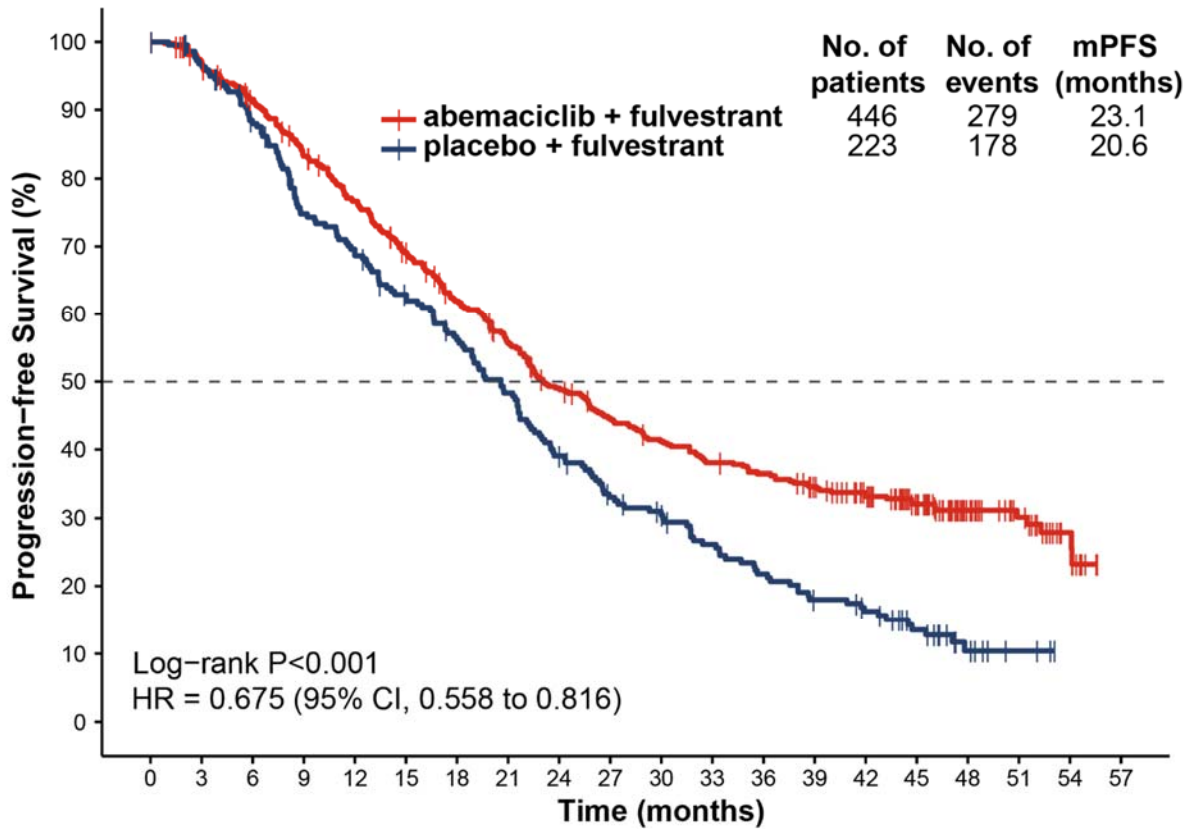

**No. at risk**

|                           |     |     |     |     |     |     |     |     |     |     |     |     |     |     |     |    |    |    |    |   |
|---------------------------|-----|-----|-----|-----|-----|-----|-----|-----|-----|-----|-----|-----|-----|-----|-----|----|----|----|----|---|
| abemaciclib + fulvestrant | 446 | 414 | 384 | 346 | 316 | 282 | 248 | 220 | 191 | 171 | 157 | 145 | 138 | 126 | 107 | 80 | 45 | 30 | 12 | 0 |
| placebo + fulvestrant     | 223 | 211 | 188 | 158 | 147 | 130 | 115 | 99  | 80  | 65  | 58  | 48  | 40  | 32  | 27  | 18 | 8  | 3  | 0  | 0 |

**eFigure 3: Kaplan-Meier Plot of Time to Second Disease Progression (PFS2)**

PFS2 was defined as the time from randomization to the discontinuation date of next-line (first line of post discontinuation treatment), or starting date of the second line of post discontinuation treatment or death from any cause, whichever was earlier. CI, confidence interval; HR, hazard ratio; mPFS, median PFS; No., number; P, p-value

A

## Time to Chemotherapy

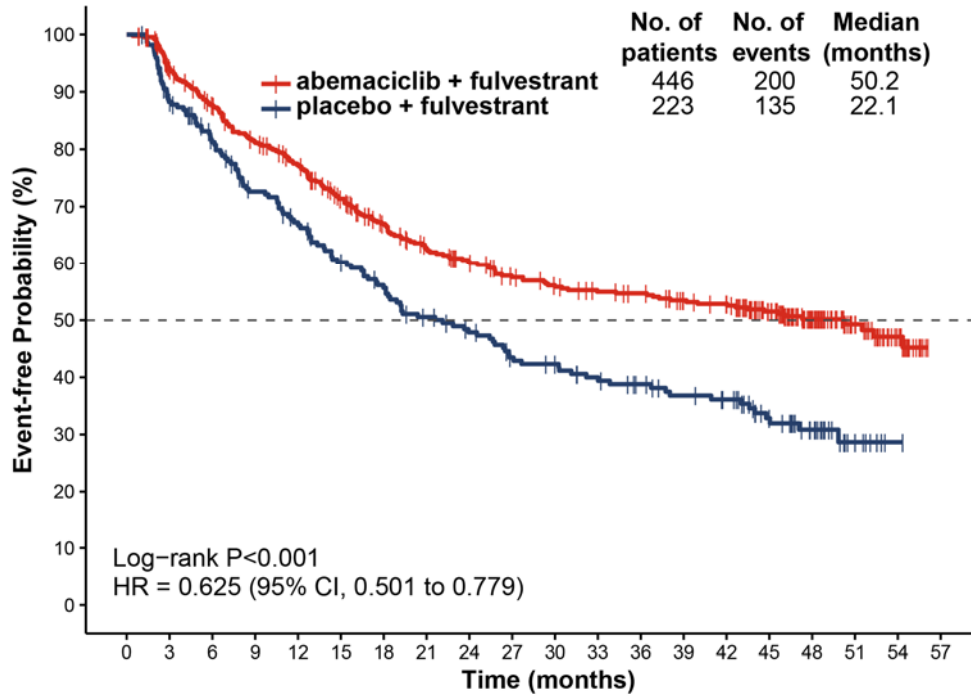

**No. at risk**

|                           |     |     |     |     |     |     |     |     |     |     |     |     |     |     |     |     |    |    |    |   |
|---------------------------|-----|-----|-----|-----|-----|-----|-----|-----|-----|-----|-----|-----|-----|-----|-----|-----|----|----|----|---|
| abemaciclib + fulvestrant | 446 | 406 | 372 | 342 | 319 | 284 | 255 | 234 | 220 | 204 | 195 | 188 | 184 | 172 | 167 | 134 | 84 | 49 | 28 | 0 |
| placebo + fulvestrant     | 223 | 194 | 171 | 149 | 136 | 120 | 109 | 97  | 88  | 77  | 73  | 67  | 61  | 55  | 51  | 36  | 24 | 7  | 1  | 0 |

B

## Chemotherapy-free Survival

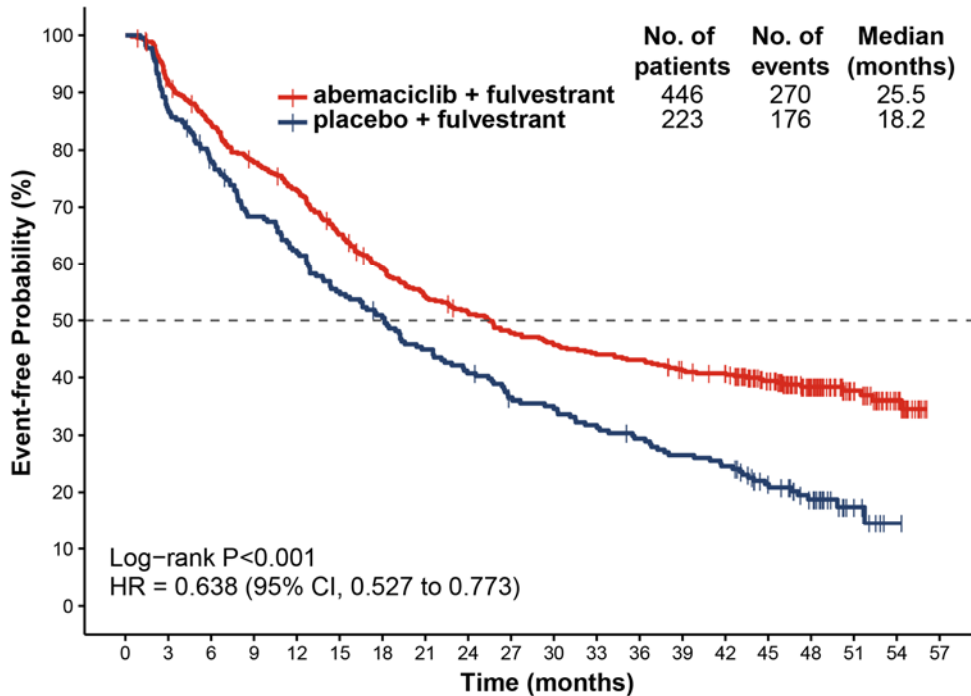

**No. at risk**

|                           |     |     |     |     |     |     |     |     |     |     |     |     |     |     |     |     |    |    |    |   |
|---------------------------|-----|-----|-----|-----|-----|-----|-----|-----|-----|-----|-----|-----|-----|-----|-----|-----|----|----|----|---|
| abemaciclib + fulvestrant | 446 | 406 | 372 | 342 | 319 | 284 | 255 | 234 | 220 | 204 | 195 | 188 | 184 | 172 | 167 | 134 | 84 | 49 | 28 | 0 |
| placebo + fulvestrant     | 223 | 194 | 171 | 149 | 136 | 120 | 109 | 97  | 88  | 77  | 73  | 67  | 61  | 55  | 51  | 36  | 24 | 7  | 1  | 0 |

**eFigure 4: Kaplan-Meier Plots of Time to Chemotherapy (TTC) and Chemotherapy-free Survival (CFS)**

Panel A, TTC was defined as the time from randomization to initiation on first post discontinuation chemotherapy (censoring pts who died prior to initiation of chemotherapy). Panel B, CFS was defined as the time from randomization to initiation of first post discontinuation chemotherapy or death. CI, confidence interval; HR, hazard ratio; No., number; P, p-value
